# Supplementary material
Source: PubMed Central journal article supplement (PMC9042708)
Supplement: NIHMS1608441-supplement-1.pdf [file NIHMS1608441-supplement-1.pdf]

## **Inventory of Supplementary Material**

- Supplementary figures (7) with legends
- Supplementary movie legends
- Supplementary movies (4)
- Supplementary table (2)
